# Supplementary material for: Solution-based self-assembly synthesis of two-dimensional-ordered mesoporous conducting polymer nanosheets with versatile properties
Source: Springer Nature journal article supplement (doi:10.1038/s41596-023-00845-4), 2023-07-17
Supplement: 41596_2023_845_MOESM1_ESM.pdf [file 41596_2023_845_MOESM1_ESM.pdf]

# **Solution-based self-assembly synthesis of two-dimensional-ordered mesoporous conducting polymer nanosheets with versatile properties**

In the format provided by the authors and unedited

**Supplementary Table 1 | A summary of works related to the preparation of mesoporous nanosheet materials by a solution-based template directed co-assembly method**

| Ref. | Materials                                                               | Publication             | Title                                                                                                                                                                                       | Application                      |
|------|-------------------------------------------------------------------------|-------------------------|---------------------------------------------------------------------------------------------------------------------------------------------------------------------------------------------|----------------------------------|
| 1    | 2D mesoporous polydopamine-graphene heterostructures                    | Nature Commun.          | Achieving stable Na metal cycling via polydopamine/multilayer graphene coating of a polypropylene separator                                                                                 | Sodium metal batteries           |
| 2    | 2D hierarchical ordered dual mesoporous polypyrrole/graphene nanosheets | Adv. Funct. Mater.      | Hierarchical ordered dual-mesoporous polypyrrole/graphene nanosheets as bi-functional active materials for high-performance planar integrated system of micro-supercapacitor and gas sensor | Micro-supercapacitor/gas sensor  |
| 3    | 2D mPPy-GO heterostructure                                              | Angew. Chem. Int. Ed.   | A two-dimensional mesoporous polypyrrole graphene oxide heterostructure as a dual-functional ion redistributor for dendrite-free lithium metal anodes                                       | Li metal batteries.              |
| 4    | Cylindrical mPPy/rGO nanosheets                                         | Angew. Chem. Int. Ed.   | A general interfacial self-assembly engineering for patterning two-dimensional polymers with cylindrical mesopores on graphene                                                              | Micro-supercapacitor             |
| 5    | mPDA/MXene heterostructure                                              | Angew. Chem. Int. Ed.   | Two-dimensional MXene-polymer heterostructure with ordered in-plane mesochannels for high-performance capacitive deionization                                                               | Capacitive deionization          |
| 6    | MXene-mPPy layers                                                       | Adv. Energy Mater.      | Charge-enriched strategy based on MXene based polypyrrole layers toward dendrite-free zinc metal anodes                                                                                     | Aqueous zinc ion batteries       |
| 7    | mesoporous-titania-mesoporous-carbon vertical heterostructure           | J. Am. Chem. Soc.       | Two-dimensional mesoporous heterostructure delivering superior pseudocapacitive sodium storage via bottom-up monomicelle assembly                                                           | Pseudocapacitive sodium storage  |
| 8    | Carbon nanotubes@mesoporous N-doped carbon                              | J. Mater. Chem. A       | Synthesis of carbon nanotubes@mesoporous carbon core-shell structured electrocatalysts via a molecule-mediated interfacial co-assembly strategy                                             | Oxygen reduction reaction        |
| 9    | GO@CNB core-shell colloidosome hybrids                                  | Adv. Mater.             | Chemically assisted formation of monolayer colloidosomes on functional particles                                                                                                            | Oxygen reduction reaction        |
| 10   | Mesoporous ferric phytate nanomeshes                                    | Small                   | General construction of 2D ordered mesoporous iron-based metal-organic nanomeshes                                                                                                           | Li-ion batteries                 |
| 11   | EG/mPANi sheets                                                         | Small                   | High power in-plane micro-supercapacitors based on mesoporous polyaniline patterned graphene                                                                                                | Micro-supercapacitors            |
| 12   | The mesoporous PTAPB nanosheets                                         | Chem. Commun.           | Constructing polymers towards ultrathin nanosheets with dual mesopores and intrinsic photoactivity                                                                                          | Fluorescent sensing              |
| 13   | Mesoporous SnO <sub>2</sub> nanosheets                                  | Adv. Funct. Mater.      | Controllably engineering mesoporous surface and dimensionality of SnO <sub>2</sub> toward high-performance CO <sub>2</sub> electroreduction                                                 | CO <sub>2</sub> electroreduction |
| 14   | 2D mesoporous $\pi$ -CMPs-coated GO                                     | Macromol. Rapid Commun. | controlled synthesis of mesoporous $\pi$ -conjugated polymer nanoarchitectures as anodes for lithium-ion batteries                                                                          | Li-ion batteries                 |
| 15   | 2D mesoporous MnO <sub>2</sub> nanosheets                               | Energy Stor. Mater.     | 2D mesoporous MnO <sub>2</sub> nanosheets for high-energy asymmetric microsupercapacitors in water-in-salt gel electrolyte                                                                  | Micro-supercapacitors            |
| 16   | hierarchical porous N,O,S-enriched carbon foam                          | Adv. Energy Mater.      | Pore and heteroatom engineered carbon foams for supercapacitors                                                                                                                             | Supercapacitors                  |
| 17   | 2D N-doped mesoporous carbon                                            | Small                   | Multi-dimensional molecular self-assembly strategy for the construction of two-dimensional mesoporous polydiaminopyridine and carbon materials                                              | CO <sub>2</sub> uptake           |

|    |                                                                   |                        |                                                                                                                                                                                    |                           |
|----|-------------------------------------------------------------------|------------------------|------------------------------------------------------------------------------------------------------------------------------------------------------------------------------------|---------------------------|
| 18 | 2D mesoporous polydopamine/reduced-graphene-oxide heterostructure | Chem. Eng. J.          | Two-dimensional redox polydopamine with in-plane cylindrical mesochannels on graphene for high-energy and high-power lithium-ion capacitors                                        | Lithium-ion capacitors    |
| 19 | mPDA/rGO nanosheets                                               | ACS Appl. Energy Mater | Two-dimensional interface engineering of mesoporous polydopamine on graphene for novel organic cathodes                                                                            | Lithium-ion batteries     |
| 20 | mesoporous nitrogen-doped carbon (rGO@N/C)                        | Chem. Mater.           | Phosphorus- and nitrogen-doped carbon nanosheets constructed with monolayered mesoporous architectures                                                                             | Oxygen reduction reaction |
| 21 | two-dimensional N-doped mesoporous carbon                         | CCS Chemistry          | Multistage self-assembly strategy: designed synthesis of N-doped mesoporous carbon with high and controllable pyridine N content for ultrahigh surface-area-normalized capacitance | Supercapacitors           |
| 22 | Nitrogen Doped Mesoporous Carbon Nanosheets                       | Nano Lett.             | Sub-nanometric manganous oxide clusters in nitrogen doped mesoporous carbon nanosheets for high-performance lithium-sulfur batteries                                               | Lithium-sulfur batteries  |

## Supplementary References

- 1 Qin, J. *et al.* Achieving stable Na metal cycling via polydopamine/multilayer graphene coating of a polypropylene separator. *Nat. Commun.* **12**, 1-10 (2021).
- 2 Qin, J. *et al.* Hierarchical ordered dual-mesoporous polypyrrole/graphene nanosheets as bi-functional active materials for high-performance planar integrated system of micro-supercapacitor and gas sensor. *Adv. Funct. Mater.* **30**, 1909756 (2020).
- 3 Shi, H. *et al.* A two-dimensional mesoporous polypyrrole-graphene oxide heterostructure as a dual-functional ion redistributor for dendrite-free lithium metal anodes. *Angew. Chem.* **132**, 12245-12251 (2020).
- 4 Tian, H. *et al.* General interfacial self-assembly engineering for patterning two-dimensional polymers with cylindrical mesopores on graphene. *Angew. Chem.* **131**, 10279-10284 (2019).
- 5 Li, Q. *et al.* Two-dimensional MXene-polymer heterostructure with ordered in-plane mesochannels for high-performance capacitive deionization. *Angew. Chem.* **133**, 26732-26738 (2021).
- 6 Zhang, Y. *et al.* Charge-enriched strategy based on MXene-based polypyrrole layers toward dendrite-free zinc metal anodes. *Adv. Energy Mater.* **12**, 2103979 (2022).
- 7 Lan, K. *et al.* Two-dimensional mesoporous heterostructure delivering superior pseudocapacitive sodium storage via bottom-up monomicelle assembly. *J. Am. Chem. Soc.* **141**, 16755-16762 (2019).
- 8 Zhu, X. *et al.* Synthesis of carbon nanotubes@ mesoporous carbon core-shell structured electrocatalysts via a molecule-mediated interfacial co-assembly strategy. *J. Mater. Chem. A* **7**, 8975-8983 (2019).
- 9 Guan, *et al.* Chemically assisted formation of monolayer colloidosomes on functional particles. *Adv. Mater.* **28**, 9596-9601 (2016).
- 10 Ai, Y. *et al.* General construction of 2D ordered mesoporous iron-based metal-organic nanomeshes. *Small* **16**, 2002701 (2020).
- 11 Liu, Z. *et al.* High power in-plane micro-supercapacitors based on mesoporous polyaniline patterned graphene. *Small* **13**, 1603388 (2017).
- 12 Wen, Y. *et al.* Constructing polymers towards ultrathin nanosheets with dual mesopores and intrinsic photoactivity. *Chem. Commun.* **56**, 3191-3194 (2020).
- 13 Wei, F. *et al.* Controllably engineering mesoporous surface and dimensionality of SnO<sub>2</sub> toward high-performance CO<sub>2</sub> electroreduction. *Adv. Funct. Mater.* **30**, 2002092 (2020).
- 14 Shi, L. *et al.* Controlled synthesis of mesoporous  $\pi$ -conjugated polymer nanoarchitectures as anodes for lithium-ion batteries. *Macromol. Rapid Commun.* **43**, 2100897 (2022).
- 15 Qin, J. *et al.* 2D mesoporous MnO<sub>2</sub> nanosheets for high-energy asymmetric micro-supercapacitors in water-in-salt gel electrolyte. *Energy Storage Materials* **18**, 397-404 (2019).
- 16 Peng, H. *et al.* Pore and heteroatom engineered carbon foams for supercapacitors. *Adv. Energy Mater.* **9**, 1803665 (2019).
- 17 Zhang, L. *et al.* Multi-dimensional molecular self-assembly strategy for the construction of two-dimensional mesoporous polydiaminopyridine and carbon materials. *Small* **19**, 2205693 (2023).
- 18 Jiang, S. *et al.* Two-dimensional redox polydopamine with in-plane cylindrical mesochannels on graphene for high-energy and high-power lithium-ion capacitors. *Chem. Eng. J.* **452**, 139095 (2023).
- 19 Wang, N. *et al.* Two-dimensional interface engineering of mesoporous polydopamine on graphene for novel organic cathodes. *ACS Appl. Energy Mater.* **2**, 5816 (2019).
- 20 Tan, H. *et al.* Phosphorus- and nitrogen-doped carbon nanosheets constructed with monolayered mesoporous architectures. *Chem. Mater.* **32**, 4248 (2020).
- 21 Zhang, L. *et al.* Multistage self-assembly strategy: Designed synthesis of N-doped mesoporous carbon with high and controllable pyridine N content for ultrahigh surface-area-normalized capacitance. *CCS Chemistry* **3**, 870-881 (2021).
- 22 Qiu, P. *et al.* Sub-nanometric manganous oxide clusters in nitrogen doped mesoporous carbon nanosheets for high-performance lithium-sulfur batteries. *Nano Lett.* **21**, 700-708 (2020).
